# Editing of the urease gene by CRISPR-Cas in the diatom *Thalassiosira pseudonana*

Amanda Hopes<sup>1</sup>, Vladimir Nekrasov<sup>2</sup>, Sophien Kamoun<sup>2</sup> & Thomas Mock<sup>1\*</sup>

<sup>1</sup> School of Environmental Science, University of East Anglia, Norwich Research Park, NR4 7TJ, Norwich, UK.

<sup>2</sup> The Sainsbury Laboratory, Norwich Research Park, NR4 7UH, Norwich, UK

\* Corresponding author email: t.mock@uea.ac.uk

## Abstract

**Background:** CRISPR-Cas is a recent and powerful edition to the molecular toolbox which allows programmable genome editing. It has been used to modify genes in a wide variety of organisms, but only two alga to date. Here we present a methodology to edit the genome of *T. pseudonana*, a model centric diatom with both ecological significance and high biotechnological potential, using CRISPR-Cas.

**Results:** A single construct was assembled using Golden Gate cloning. Two sgRNAs were used to introduce a precise 37nt deletion early in the coding region of the urease gene. A high percentage of bi-allelic mutations ( $\leq 61.5\%$ ) were observed in clones with the CRISPR-Cas construct. Growth of bi-allelic mutants in urea led to a significant reduction in growth rate and cell size compared to growth in nitrate.

**Conclusions:** CRISPR-Cas can precisely and efficiently edit the genome of *T. pseudonana*. The use of Golden Gate cloning to assemble CRISPR-Cas constructs gives additional flexibility to the CRISPR-Cas method and facilitates modifications to target alternative genes or species.

**Keywords:** CRISPR-Cas, diatom, genome editing, urease, Golden Gate, *Thalassiosira pseudonana*

27

## 28 Background

29 Diatoms are ecologically important microalgae with high biotechnological potential. Since their  
30 appearance about 240 million years ago [1], they have spread and diversified to occupy a wide range  
31 of niches across both marine and freshwater habitats. Diatom genomes have been shaped by  
32 secondary endosymbiosis and horizontal gene transfer resulting in genes derived from heterotrophic  
33 hosts, autotrophic endosymbionts and bacteria [2, 3]. They play a key role in carbon cycling [4], the  
34 food chain, oil deposition and account for about 20% of the world's annual primary production [5,  
35 6]. However, they are perhaps best known for their intricate silica frustules which give diatoms a  
36 range of ecological advantages and play a key role for carbon sequestration and silica deposition.

37 Several aspects of diatom physiology including the silica frustule, lipid storage and photosynthesis  
38 are being applied to biotechnology. Areas of high interest include nanotechnology [7], drug delivery  
39 [8], biofuels [9], solar capture [10] and bioactive compounds [11].

40 Given the ecological importance of diatoms and their applications for biotechnology, it is pivotal that  
41 the necessary tools are available to study and manipulate them at a molecular level. This includes  
42 the ability to replace, tag, edit and impair genes. A recent addition to the genetic tool box, CRISPR-  
43 Cas, allows double strand breaks (DSBs) to be introduced at specific target sequences. This adapted  
44 mechanism, used by bacteria and archaea in nature as a defence system against viruses, facilitates  
45 knock-out by the introduction of mutations through repair by error prone non-homologous end  
46 joining (NHEJ) or homologous recombination (HR). This requires both a Cas9 to cut the DNA and a  
47 sgRNA to guide it to a specific sequence. Further information on the history and application of  
48 CRISPR-Cas can be found in several excellent reviews [12–14]. Zinc-finger nucleases (ZFNs),  
49 meganucleases and transcription activator-like effector nucleases (TALENs) have also been used to  
50 induce double strand breaks. TALENs and CRISPR-Cas both bring flexibility and specificity to gene  
51 editing, however CRISPR-Cas is also cheap, efficient and easily adapted to different sequences by  
52 simply changing the 20nt guide sequence in the sgRNA.

53 So far, within the diverse group of algae, the diploid, pennate diatom *Phaeodactylum tricornutum*  
54 [15] and the haploid, green alga *Chlamydomonas reinhardtii* [16] have been subject to gene editing  
55 by CRISPR-Cas. NHEJ and HR have been used to repair DSBs following CRISPR-Cas or TALENs in *P.*  
56 *tricornutum*, introducing mutations into a nuclear coded chloroplast signal recognition particle [15],  
57 the urease gene [17] and several genes associated with lipid metabolism [18]. *Thalassiosira*  
58 *pseudonana* is a logical choice for CRISPR-Cas development. It is a model centric diatom with a  
59 sequenced genome (first eukaryotic marine phytoplankton to be sequenced [2]) and well-  
60 established transformation systems [19, 20]. The genus has multiple biotechnology applications [8,  
61 21, 22], and although gene silencing has been established, a method to easily and efficiently knock-  
62 out and edit genes and the entire genome would be highly advantageous. The genus *Thalassiosira* is  
63 among the top 10 genera of diatoms in the World's Ocean in terms of ribotype (V9 of 18S) diversity  
64 and abundance [23] and the species *T. pseudonana* is a model for understanding the mechanisms  
65 behind silicification [24–26].

66 Golden Gate cloning can add further flexibility to CRISPR-Cas methods as demonstrated in higher  
67 plants [27]. As a modular cloning system it allows different modules, including the sgRNA, to be  
68 easily interchanged or added [28]. As a result, new constructs can be made quickly, cheaply and  
69 efficiently for new or multiple targets. This extends to any aspect of the construct, including  
70 promoters, Cas9 variants and their nuclear localisation signals (NLS). As a result, construct  
71 alterations such as replacing constitutive promoters for inducible ones, exchanging the wildtype

Cas9 for a Cas9 nickase or changing the localisation signal to target other organelles can be easily carried out.

An increasing range of software tools are available for CRISPR-Cas, including programs that facilitate sgRNA target searches in a genetic locus of interest, estimate efficiencies of sgRNAs [29] and perform off-target predictions.

While off-target prediction tools tend to be species specific, there are tools that accept requests for a genome to be added to the list, or allow for a genome to be directly uploaded [30, 31]. The latter is particularly useful for less studied organisms, such as diatoms. The ability to combine several different aspects of sgRNA design can help to make an informed decision when choosing target sites for gene editing.

Our paper represents a proof of concept to demonstrate the feasibility of gene editing in the model diatom *T. pseudonana* using two sgRNAs to induce a precise deletion in the urease gene. Methods combine a flexible Golden Gate cloning approach with sgRNA design, which draws on several available online tools. This takes into account multiple factors, such as position within the gene in terms of both early protein disruption and presence in the coding region, DNA cutting efficiency and presence of restriction enzyme sites at the cut site. The latter, in combination with inducing a large deletion by targeting with two sgRNAs, allows easy screening of mutants through either the restriction enzyme site loss assay [32] or the PCR band-shift assay [33], respectively.

## Method

### Strains and growth conditions

*Thalassiosira pseudonana* (CCMP 1335) was grown in 24h light (100-140  $\mu$ E) at 20°C in half salinity Aquil synthetic seawater [34]. For routine growth, a 1mM nitrate concentration was used.

### 5'RACE U6 promoter

To identify the U6 small nuclear RNA (snRNA) in *T. pseudonana*, an NCBI blastn search was performed on the genome against the central conserved region of the U6 sequence. Two potential guanine (G) start sites were found downstream of a TATA box in the promoter. To identify the start site of the U6 snRNA and empirically determine the end of the promoter, 5' RACE was carried out as follows: 400ml of culture was grown to exponential phase ( $1 \times 10^6$  cells  $\text{ml}^{-1}$ ) and harvested. Small RNAs were extracted and enriched using a miRNeasy kit (Qiagen). 5' template switching oligo RACE was performed according to Pinto and Lindblad [35]. For oligos used see Table 1 (ref. numbers 1-3). RACE products were sequenced and results aligned to the genome to determine the end of the promoter.

### Plasmid construction using Golden Gate cloning

Golden Gate cloning was carried out according to Weber et al. [28] and Belhaj et al. [33]. BsaI and BpiI sites were removed in a so-called "domestication" procedure using a Q5 site-directed mutagenesis (SDM) kit (NEB). For oligos used in SDM see Table 1 (ref. numbers 17-20). BsaI sites and specific 4nt overhangs for Level 1 (L1) assembly were added through PCR primers (Table 1). Plasmid DNA was extracted using a Promega mini-prep kit.

### Golden Gate reactions

Golden Gate reactions for L1 and Level 2 (L2) assembly were carried out using the method specified in Weber et al. [28]. Forty fmol of each component was included in a 20 $\mu$ l reaction with 10 units of BsaI or BpiI and 10 units of T4 DNA ligase in 1x ligation buffer. The reaction was incubated at 37°C for

5 hours, 50°C for 5 minutes and 80°C for 10 minutes. Five µl of the reaction was transformed into 50µl of NEB 5-alpha chemically competent *E. coli*.

#### Level 0 assembly

The endogenous FCP promoter and terminator were amplified with GoTaq flexi (Promega) from domesticated pTpFCP/NAT [19] and the U6 promoter from gDNA (extracted with an Easy-DNA gDNA purification kit (Thermo Fisher)). Both promoters are associated with high expression levels. The U6 promoter was amplified from the position -470 to -1 (the end of the promoter), cutting off a Bpil site and removing the need for additional SDM. For oligos, see Table 1 (ref. numbers 6-7 and 10-13). Products were cloned into a pCR8/GW/TOPO vector (Thermo Fisher).

Domesticated human codon bias Cas9 from *Streptococcus pyogenes* with an N-terminal SV40 NLS and a C-terminal YFP tag was PCR-amplified using Phusion DNA polymerase (NEB) and L1 Cas9:YFP plasmid as a template. The PCR product was purified with a GFX PCR DNA and gel purification kit (GE Healthcare) and incubated for 20 minutes with Taq to add adenine overhangs before cloning directly into a pCR8/GW/TOPO vector. For oligos, see Table 1 (ref. numbers 8-9).

#### Level 1 assembly

The FCP:NAT cassette was PCR-amplified using Phusion polymerase and the domesticated pTpFCP/NAT as a template, purified and inserted into a L1 pICH47732 destination vector. FCP promoter, Cas9 and FCP terminator L0 modules were assembled into L1 pICH47742. For oligos, see Table 1 (ref. numbers 4-5).

The sgRNA scaffold was amplified from pICH86966\_AtU6p\_sgRNA\_NbPDS [32] with sgRNA guide sequences integrated through the forward primers. Together with the L0 U6 promoter, sgRNA\_Urease 1 and sgRNA\_Urease 2 were assembled into L1 destination vectors pICH47751 and pICH47761, respectively. For oligos, see Table 1 (ref. numbers 14-16).

#### Level 2 assembly

L1 modules pICH47732:FCP:NAT, pICH47742:FCP:Cas9YFP, pICH47751:U6:sgRNA\_Urease 1, pICH47761:U6:sgRNA\_Urease 2 and the L4E linker pICH41780 were assembled into the L2 destination vector pAGM4723. Constructs were screened by digestion with EcoRV and sequenced. For oligos used in sequencing, see Table 1 (ref. numbers 27-35). See Figure 1 for an overview of the Golden Gate assembly procedure and the final construct.

### **sgRNA design for the urease gene knockout**

Two sgRNAs were designed to cut 37nt apart early in the coding region of the urease gene (JGI ID 30193) to induce a deletion and frame-shift. Several programmes, explained below, were used to collect data and make an informed decision on sgRNA choice. Excel was used to combine, process and compare data.

#### Selecting CRISPR-Cas targets and estimating on-target score

Twenty bp targets with an NGG PAM were identified and scored for on-target efficiency using the Broad Institute sgRNA design programme ([www.broadinstitute.org/rnai/public/analysis-tools/sgRNA-design](http://www.broadinstitute.org/rnai/public/analysis-tools/sgRNA-design)), which utilises the Doench et al. [29] on-target scoring algorithm calculated from >1800 empirically tested sgRNAs.

#### Determining cut positions and cross referencing to restriction recognition sites

All restriction sites and their positions within the urease gene were identified using the Emboss restriction tool (<http://emboss.bioinformatics.nl/>). As the Broad Institute sgRNA design programme does not give the location of CRISPR-Cas targets within a gene, this was determined using Primer map ([http://www.bioinformatics.org/sms2/primer\\_map.html](http://www.bioinformatics.org/sms2/primer_map.html) [36]). The cut site position (3nt upstream of the start of the PAM sequence) was calculated for each sgRNA depending on sense or anti-sense strand placement. All predicted CRISPR-Cas cut sites were cross-referenced to restriction recognition sites.

## Reverse complement of antisense strand CRISPR-Cas targets

The reverse complement (RC) was found for each CRISPR-Cas target using the programme: [http://www.bioinformatics.org/sms2/rev\\_comp.html](http://www.bioinformatics.org/sms2/rev_comp.html) [36]. In the final spreadsheet (Supplementary Figure 1), if a target was located on the anti-sense strand, the RC was shown for the 'sense strand sequence' column. This allows the sgRNA to be easily searched within the original gene sequence.

## Determine position of CRISPR-Cas cut sites in relation to coding region

An array was made with start and end positions for each exon/intron. Cut site positions were compared to exon/intron ranges and the relevant exon/intron returned if the data overlapped. The final spreadsheet gives data on CRISPR-Cas target sequences and their sense sequence (if located on the antisense strand), location of target (relative to the sense strand), predicted CRISPR-Cas cut site, first nucleotide of the target, PAM sequence, location (i.e. exon, intron), strand, sgRNA score and restriction recognition sites overlapping the cut site. The table (Supplementary Figure 1) was sorted to prioritise sgRNAs by starting base prioritising guanine, sgRNA score, position within the gene and interaction with restriction recognition sites.

## Predicting off-targets

The full 20nt target sequences and their 3' 12nt seed sequences were subjected to a nucleotide BLAST search against the *T. pseudonana* genome. Resulting homologous sequences were checked for presence of an adjacent NGG PAM sequence at the 3' end. The 8nt sequence outside of the seed sequence was manually checked for complementarity to the target sequence. In order for a site to be considered a potential off-target the seed sequence had to match, a PAM had to be present at the 3' end of the sequence and a maximum of three mismatches between the target and sequences from the blast search were allowed outside of the seed sequence.

Off-targets were also checked using the EuPaGDT program [31], which checks for up to 5 mismatches in the 20nt target sequence and the CasOT program [30], which uses flexible parameters for identifying off-target sequences. Parameters were set to check for an NGG PAM, complete complementarity within the 12nt seed sequence and up to 3 mismatches outside of the seed region.

## **Transformation and selection**

Using the Poulsen et al. [19] method, transformations were carried out in triplicate with the CRISPR-Cas construct, pTfcp/nat (positive control) and water (negative control). Five x 10<sup>7</sup> cells in exponential phase were used per shot with a rupture disc of 1350psi and a 7cm flight distance. Following transformation, cells were rinsed into 25ml of media and left to recover for 24 hours under standard growth conditions. Cells were counted using a Coulter counter (Beckman) and 2.5 x 10<sup>7</sup> cells from each transformation were spread onto 5, ½ salinity Aquil 0.8% agar plates (5 x 10<sup>6</sup> cells/ plate) with 100µg ml<sup>-1</sup> nourseothricin. Plates were incubated under standard conditions for two weeks. Remaining sample was diluted to 1 x 10<sup>6</sup> cell ml<sup>-1</sup> in media and supplemented with nourseothricin to final a concentration of 100µg ml<sup>-1</sup> for liquid selection. Liquid selection cultures were maintained under standard growth conditions with 100µg ml<sup>-1</sup> nourseothricin. Colonies were picked and transferred to 20µl of media. Ten µl from each colony was transferred to 1ml of selective media for further growth. The remaining sample was used in screening.

To isolate sub-clones from colonies which screened positive for mutations, 100µl of cells at exponential phase were streaked onto ½ salinity Aquil 0.8% agar plates with 100µg ml<sup>-1</sup> nourseothricin.

## **Screening clones and cultures**

Ten µl from each colony or culture from liquid selection, was spun down and supernatant removed. Cells were re-suspended in 20µl of lysis buffer (10% Triton X-100, 20mM Tris-HCl pH8, 10mM EDTA),

kept on ice for 15 minutes then incubated at 95°C for 10 minutes. One µl of lysate was used in Taq PCR to amplify the CRISPR-Cas targeted fragment of the urease gene. Clones were also screened for Cas9 and NAT. For PCR primers, see Table 1 (ref. numbers 21-26). PCR products were run on an agarose gel to check for the lower MW band associated with a double-cut deletion in the urease gene and for the presence of Cas9 and NAT. Urease PCR products were also digested with BsaI and HpaII to determine if the restriction recognition sites, which overlap the cut sites, had been mutated. PCR products were sent for sequencing to confirm mutations.

## Growth experiments

Knockout and wild-type (WT) cultures were nitrate depleted by growing cells in nitrate free media until cell division stopped and quantum yield of photosynthesis (Fv/Fm measured on the Phyto-PAM-ED) dropped below 0.2. Cultures were then transferred in triplicate at a final concentration of  $2.5 \times 10^4$  cells ml<sup>-1</sup> into 25ml of media with either 1mM sodium nitrate or 0.5mM urea. Cell count and mean cell size were measured once a day using a Coulter counter. Fv/Fm measurements were also taken daily. Growth rates were calculated using  $\mu = \frac{\ln_2 - \ln_1}{T_2 - T_1}$ , where T is a time point corresponding to exponential growth and Ln is the natural log of cell counts ml<sup>-1</sup>. Analysis of variance with Tukey's pairwise comparison was used to compare both growth rates and cell size at the end of exponential phase between samples.

## Results and discussion

### sgRNA design

The two CRISPR-Cas targets with the highest on target scores (0.5 and 0.79), containing a predicted cut site over a restriction site and occurring early in the coding region, were chosen. sgRNAs were designed to cut 37nt apart at positions 138 and 175 within the urease gene. Both targets started with a G for polymerase III transcription (Figure 2). No off-target sites were predicted for sgRNAs designed for either of the two CRISPR-Cas target sequences.

### Constructing the CRISPR-Cas plasmid using the Golden Gate cloning method

A single CRISPR-Cas construct was made using Golden Gate cloning (Figure 1). The construct included the NAT selectable marker and Cas9:YFP driven by an endogenous FCP promoter for high expression and two U6 promoter-driven sgRNAs. RNA polymerase III U6 promoters are a popular choice for expression of sgRNAs in CRISPR-Cas [15, 27, 37–39]. RACE products showed that the U6 promoter ended 23nt after the TATA box. As a standardised, efficient, modular system, Golden Gate cloning gives a high level of flexibility to the CRISPR-Cas method and bypasses the need for co-transformation as it enables assembly of multiple expression units, such as Cas9 and sgRNAs, into a single vector backbone. Multiple sgRNA modules can be incorporated into the construct to target several genes or whole pathways. In human cells, up to 7 sgRNAs have been successfully assembled and expressed from a single construct created using the Golden Gate cloning method [39]. Golden Gate has also proved successful for building constructs for genome editing in higher plants using both TALENs [41] and CRISPR-Cas [33, 37].

In this study, only the promoters and target sequences are specific to *T. pseudonana*, which demonstrates how simple it can be to apply this method to a new species using the Golden Gate system. The *S. pyrogenes* Cas9 with a human codon bias, shown previously to work in higher plants [32, 33, 37], carries a SV40 NLS, which follows a canonical sequence found throughout eukaryotes, including *T. pseudonana*.



The long term effects from off-target mutations introduced through CRISPR-Cas are currently unknown, therefore it may be advantageous for future work to remove CRISPR-Cas constructs from mutants. Adding a yeast CEN6-ARSH4-HIS3 sequence to plasmids allows autonomous replication in diatoms and expression of genes without random integration into the genome [20]. Furthermore, removing selection leads to plasmids being discarded. By expressing CRISPR-Cas genes and selective markers on a removable episome, mutations could be introduced without integration of the plasmid. CRISPR-Cas constructs could then be expelled by removing selection. As well as considerations for long term off-target effects, this could also be advantageous for studies and applications which are sensitive to the presence of transgenes.

### Selecting and screening for mutations in the urease gene

The transformation efficiency with the CRISPR-Cas construct was on average 41.5 colonies  $\mu\text{g}^{-1}$  plasmid (13.35-66.65 colonies  $\mu\text{g}^{-1}$  plasmid). Thirty three colonies were screened by PCR and sequencing of the targeted urease gene fragment.

Four colonies showed mutations in the urease gene. All colonies screened positive for NAT but only the four colonies with mutations screened positive for Cas9, suggesting that once the Cas9 and sgRNAs are present there is a high chance of inducing mutations in the target gene. The lack of Cas9, which accounts for a third of the construct, in the majority of colonies was potentially caused by shearing of the plasmid during microparticle bombardment [38] from either mechanical force or chemical breakdown [42].

Of the four primary colonies which screened positive for mutations (Figure 2), one (M4) showed a single band with a 37nt deletion between the two sgRNA cut sites which suggests that both copies of the urease gene contain the deletion giving a bi-allelic mutant. Two colonies (M2 and M3) produced two bands following PCR: a WT higher MW band and a lower MW band with the 37nt deletion, confirmed by sequencing (Figure 2). The fourth colony (M1) showed a single band associated with the WT urease, however sequencing showed two products: a WT urease and a mutant urease with a 4nt deletion at the first sgRNA cut site. A mixture of PCR products may be due to a mono-allelic mutation, in which one allele is WT and the other displays a mutation. It can also be due to colony mosaicism where a colony contains a mixture of cells with WT and mutant alleles due to mutations occurring after transformed cells have started to divide. Both mono-allelic mutants and mosaic colonies have been observed in *P. tricornutum* [15, 18].

To determine if the colonies were mosaic or mono-allelic, cells from mutant clones producing mixed PCR products were spread onto selective plates to isolate single sub-clones. Thirty four sub-clones from each clone were screened by PCR (a few examples are presented in Figure 2). Two clones (M2 and M3) were mosaic with a mixture of sub-clones showing either a single band corresponding to the expected deletion (61.5% and 25%, respectively), two bands associated with the WT and expected deletion (25.5% and 28.1%, respectively) or a single band corresponding to the WT urease fragment (13% and 46.9% respectively). For each of the two clones PCR amplicons from three putative bi-allelic sub-clones were sequenced (Figure 2). Four out of six (M2\_9, M2\_10, M3\_10 and M3\_11) showed the expected 37nt 'clean' deletion without any additional mutations. Precise deletions, such as this, using 2 sgRNAs have previously been generated with high efficiency [37, 43], and allow a large degree of control over the mutation. Two of the sub-clones (M3\_9 and M2\_12) showed one allele with the expected 37nt deletion and the other with an additional deletion at the 2<sup>nd</sup> sgRNA cut site. In addition, M2\_12 showed a C->G SNP within the sgRNA1 target site. Sub-clones derived from the M1 clone showed WT and 4nt deletion PCR amplicons as seen in the original clone, suggesting that this clone may have a mono-allelic mutation.

Using CRISPR-Cas with one sgRNA can introduce a variety of indels into a locus of interest via the error-prone NHEJ DNA repair mechanism [15]. Cas9 preferentially cuts DNA three nucleotides upstream of the PAM sequence in the seed region [44] and the NHEJ mechanism either repairs a double strand break perfectly or indels are introduced. If cut sites are not cleaved at the same time, when using two sgRNAs, mutations at each site rather than removal of the fragment in between target sites may occur [37]. In this study, however, we report a high occurrence of bi-allelic mutants with precise deletions between the CRISPR-Cas cut sites, suggesting that the Cas9/sgRNA complex is cutting efficiently and DNA ends tend to be repaired perfectly. This allows control over the introduced mutations and gives the chance to avoid introducing in-frame indels.

Restriction digest (results not shown) and sequencing (Figure 2) demonstrated loss of the BclI site in all knock-out clones and HpaII in M2\_12 and M1 as a deletion downstream of the cut site is required to remove the HpaII site. This demonstrates that restriction screening can be a valuable tool, however in this case screening for a deletion based band shift by PCR was an efficient way of identifying bi-allelic mutants especially given the limited sgRNA/restriction site interactions available for this gene.

As well as clones from plate selection, one culture from liquid selection (LM1; population of cells transferred to liquid selective media after transformation), showed a single band associated with the bi-allelic 37nt deletion following PCR. This was confirmed by sequencing (Figure 2). PCR screening following growth of LM1 in urea showed only the lower MW band product (results not shown), giving further evidence for a bi-allelic mutation from a population of cells. As small volumes of cells are transferred to fresh media when passaging this may have isolated bi-allelic mutants.

### **Growth experiments with mutants**

Urease catalyses the breakdown of urea to ammonia allowing it to be used as a source of nitrogen [45]. Sub-clones from different cell-lines with 37 or 38nt deletions were tested for knock-out of the urease gene by looking for a lack of growth when supplemented with urea as the sole nitrogen source.

Cells were nitrogen starved and then transferred to media with either nitrate or urea. Cell counts, cell size and Fv/Fm were measured daily for 7 days. Negative controls to account for any background nitrate in the media were also run in which no nitrate or urea was added for WT cultures.

Four putative bi-allelic mutants (LM1, M4, M2\_10 and M3\_9) were tested along with WT and the mono-allelic M1\_10 over two growth curve experiments. Both LM1 from liquid selection ( $p=0.0029$ ) and the sub-clone M3\_9 ( $p=0.0000001$ ) showed a significant decrease in growth rate in urea compared to nitrate (Figure 3) as well as a significant 13-18% decrease in cell size (Figure 4;  $p=0.0029$  and  $p=0$ , respectively). The latter was also apparent with light microscopy (results not shown). Mutants in urea could be easily discerned even without cell counts, as cultures appeared much paler in colour. M4 did not show a difference in growth rate but did show a significant decrease in cell size ( $p=0.038$ ). The mono-allelic mutant M1\_10, displayed higher growth in urea and similar growth to the WT control (Figure 3). This correlates with results from Weyman et al. [17] which showed that despite a reduced protein concentration, a mono-allelic urease knock-out was able to grow in urea. M2\_10 which screened as a bi-allelic mutant prior to growth experiments showed a smaller but still significant decrease in growth rate ( $p=0.0014$ ) (Figure 3) and cell size ( $p=0.0039$ ) (Figure 4). PCR screening of the urease gene following growth in nitrate and urea showed the expected bi-allelic mutation for LM1, M3\_9 and M4, however M2\_10 also showed a faint WT band in nitrate and a strong WT band in urea (Figure 5). This suggests that M2\_10 was mosaic, with cells containing a functional urease out-competing those with a mutant urease. Given that only a



faint WT band was present after growth in nitrate this suggests that the majority of the cells from the sub clone contained the mutant urease, initially accounting for the majority of growth and resulting in a lower but still significant decrease in growth rate.

Knock-out of the urease gene in the diatom *P. tricornutum* prevents growth in urea [17]. Urease mutants in this study still grew in urea but with a lower growth rate and reduced cell-size, characteristics which are associated with nitrogen limitation in diatoms [46, 47] rather than nitrogen starvation. Mutant cell-lines in urea grew to the same density as the same cell-lines in nitrate, but at a lower rate (Figure 3). As nitrogen is an essential nutrient for growth, this suggests that mutant cells in urea still have access to nitrogen, but lower growth rates and cell-size indicates that nitrogen may not be as readily available compared to cells grown with nitrate. Controls in nitrogen free media showed very little growth which suggests that growth of mutants in urea was not due to residual nitrate in the culture. It is unlikely that random integration of the CRISPR-Cas plasmid is responsible for reduced growth rate in mutants as all four individual mutant cell-lines display increased growth rates when grown in nitrate. Therefore it seems likely that impaired growth of urease mutants in urea is due to a reduction in function of the urease gene.

There are a few possible reasons why a mutation in the urease gene appears to lead to nitrogen limitation rather than nitrogen starvation as seen in *P. tricornutum*. Cells may be able to access nitrogen from another source, separate to the breakdown of urea via urease. Some algae have an alternative pathway for breakdown of urea but this has only been found in Chlorophyceae [48] and blast searches show no evidence of urea carboxylase or allophanate hydroxylase, the enzymes involved in this pathway, in *T. pseudonana*.

The urease gene may still be active but with lower functionality. In *T. pseudonana* urease is modelled to be 807 amino acids. Urease consists of multimers of three sub-units: gamma, beta and alpha, which in TP are translated as one protein. The alpha sub-unit contains the active site which catalyses the breakdown of urea to ammonia [45]. The gamma subunit has no known enzymatic function [49] but may play a role in quaternary structure and stability [45, 50].

Translations of urease sequences with both 37 and 38nt deletions show frame shifts and early stop codons after the deletion in the gamma sub-unit, leading to major disruption of the gamma sub-unit, nonsense down-stream and short products of 24 or 44 amino acid residues (Figure 6). Since all mono-clonal bi-allelic mutants tested for growth in urea had either two alleles with a 37nt deletion or both a 37 and 38nt deletion, it was predicted that the urease gene would no longer be functional. However, several mechanisms exist in eukaryotes which can allow translation of the protein from start codons later in the coding region. These include leaky initiation, re-initiation of ribosomes and internal ribosome entry sites (IRES) [51]. IRES have been shown to become active in yeast following amino acid starvation [51]. If an in-frame translation can occur after the deletion at an IRES or via a mechanism such as re-initiation then the active site located in the alpha-subunit could still be present. The first in-frame ATG after the deletion would start translation of the protein just before the beta sub-unit, leading to an N-terminal truncated protein without the gamma sub-unit but with both the beta and alpha sub-units (Figure 6). Earlier start codons are predicted to result in non-sense and early stop codons.

The 5' end of the urease coding region was targeted to induce a frame shift and disrupt the protein early on, however it may be better to target the active site or entirely remove the gene. Precise deletions larger than a gene using CRISPR-Cas and two sgRNAs have been previously demonstrated [43].

## Conclusions

CRISPR-Cas can precisely and efficiently edit the genome of the diatom *Thalassiosira pseudonana*. Twelve percent of initial colonies and 100% which screened positive for Cas9 showed evidence of a mutation in the urease gene, with many sub-clones showing precise bi-allelic 37nt deletions from two sgRNA DSBs. Screening for the deletion by PCR allowed efficient identification of bi-allelic mutants and Golden Gate cloning allowed easy assembly of a plasmid for CRISPR-Cas. This included adapting the system for *T. pseudonana* by including endogenous promoters and two specific sgRNAs. Due to the flexible modular nature of the cloning system, this can be easily adapted for other genes in *T. pseudonana*. A variety of available online tools were used to design two sgRNAs that would target the early coding region of the urease gene. A reduced growth rate and cell-size phenotype was seen in mutant cell-lines grown in urea compared to nitrate, suggesting that function of the urease may have been impaired rather than removed or an alternative source of nitrogen was available. As potentially the most important tool in gene editing to date, CRISPR-Cas is fast becoming a key method in the molecular toolbox for a large variety of organisms. This efficient method has huge potential for future work from both an ecological and biotechnology perspective in *T. pseudonana* and can potentially be easily adapted for many other algal species.

## Acknowledgements

This work has been funded by a PhD studentship from the Natural Environment Research Council (NERC) awarded to AH. TM was partially supported by NERC (NE/K013734/1) and the School of Environmental Sciences at UEA. We are thankful to Lewis Dunham for his contributions to the 5' RACE for identifying the U6 promoter.

## References

1. Kooistra WHCF, Medlin LK: **Evolution of the Diatoms (Bacillariophyta)**. *Mol Phylogenet Evol* 1996, **6**:391–407.
2. Armbrust, E Virginia and Berges, John A and Bowler, Chris and Green, Beverley R and Martinez, Diego and Putnam, Nicholas H and Zhou, Shiguo and Allen, Andrew E and Apt, Kirk E and Bechner M and others: **Lawrence Berkeley National Laboratory Lawrence Berkeley National Laboratory**. 2004.
3. Bowler C, Allen AE, Badger JH, Grimwood J, Jabbari K, Kuo A, Maheswari U, Martens C, Maumus F, Otillar RP, Rayko E, Salamov A, Vandepoele K, Beszteri B, Gruber A, Heijde M, Katinka M, Mock T, Valentin K, Verret F, Berges J a, Brownlee C, Cadoret J-P, Chiovitti A, Choi CJ, Coesel S, De Martino A, Detter JC, Durkin C, Falciatore A, et al.: **The Phaeodactylum genome reveals the evolutionary history of diatom genomes**. *Nature* 2008, **456**:239–244.
4. Smetacek V: **Diatoms and the ocean carbon cycle**. *Protist News* 1999, **150**:25–32.
5. Field CB: **Primary Production of the Biosphere: Integrating Terrestrial and Oceanic Components**. *Science (80- )* 1998, **281**:237–240.
6. Falkowski PG, Raven JA: *Aquatic Photosynthesis*. Second. Princeton University Press; 2007.

- 428 7. Dolatabadi JEN, de la Guardia M: **Applications of diatoms and silica nanotechnology in**  
429 **biosensing, drug and gene delivery, and formation of complex metal nanostructures.** *TrAC - Trends*  
430 *Anal Chem* 2011, **30**:1538–1548.
- 431 8. Delalat B, Sheppard VC, Rasi Ghaemi S, Rao S, Prestidge C a., McPhee G, Rogers M-L, Donoghue JF,  
432 Pillay V, Johns TG, Kröger N, Voelcker NH: **Targeted drug delivery using genetically engineered**  
433 **diatom biosilica.** *Nat Commun* 2015, **6**:8791.
- 434 9. d'Ippolito G, Sardo A, Paris D, Vella FM, Adelfi MG, Botte P, Gallo C, Fontana A: **Potential of lipid**  
435 **metabolism in marine diatoms for biofuel production.** *Biotechnol Biofuels* 2015, **8**:28.
- 436 10. Jeffryes C, Campbell J, Li H, Jiao J, Rorrer G: **The potential of diatom nanobiotechnology for**  
437 **applications in solar cells, batteries, and electroluminescent devices.** *Energy Environ Sci* 2011,  
438 **4**:3930.
- 439 11. Kuczynska P, Jemiola-Rzeminska M, Strzalka K: **Photosynthetic pigments in diatoms.** *Mar Drugs*  
440 2015, **13**:5847–5881.
- 441 12. Lander ES: **The Heroes of CRISPR.** *Cell* 2016, **164**:18–28.
- 442 13. Sander JD, Joung JK: **CRISPR-Cas systems for editing, regulating and targeting genomes.** *Nat*  
443 *Biotechnol* 2014, **32**:347–55.
- 444 14. Doudna J a., Charpentier E: **The new frontier of genome engineering with CRISPR-Cas9.** *Science*  
445 *(80- )* 2014, **346**:1258096–1258096.
- 446 15. Nymark M, Sharma AK, Sparstad T, Bones AM, Winge P: **A CRISPR/Cas9 system adapted for gene**  
447 **editing in marine algae.** *Sci Rep* 2016, **6**(April):24951.
- 448 16. Shin S-E, Lim J-M, Koh HG, Kim EK, Kang NK, Jeon S, Kwon S, Shin W-S, Lee B, Hwangbo K, Kim J,  
449 Ye SH, Yun J-Y, Seo H, Oh H-M, Kim K-J, Kim J-S, Jeong W-J, Chang YK, Jeong B: **CRISPR/Cas9-induced**  
450 **knockout and knock-in mutations in Chlamydomonas reinhardtii.** *Sci Rep* 2016, **6**(April):27810.
- 451 17. Weyman PD, Beeri K, Lefebvre SC, Rivera J, Mccarthy JK, Heuberger AL, Peers G, Allen AE, Dupont  
452 CL: **Inactivation of Phaeodactylum tricornutum urease gene using transcription activator-like**  
453 **effector nuclease-based targeted mutagenesis.** *Plant Biotechnol J* 2015, **13**:460–470.
- 454 18. Daboussi F, Leduc S, Maréchal A, Dubois G, Guyot V, Perez-Michaut C, Amato A, Falcioratore A,  
455 Juillerat A, Beurdeley M, Voytas DF, Cavarec L, Duchateau P: **Genome engineering empowers the**  
456 **diatom Phaeodactylum tricornutum for biotechnology.** *Nat Commun* 2014, **5**(May):3831.
- 457 19. Poulsen N, Chesley PM, Kröger N: **Molecular genetic manipulation of the diatom Thalassiosira**  
458 **pseudonana (Bacillariophyceae).** *J Phycol* 2006, **42**:1059–1065.
- 459 20. Karas BJ, Diner RE, Lefebvre SC, McQuaid J, Phillips APR, Noddings CM, Brunson JK, Valas RE,  
460 Deerinck TJ, Jablanovic J, Gillard JTF, Beeri K, Ellisman MH, Glass JI, Hutchison III C a., Smith HO,  
461 Venter JC, Allen AE, Dupont CL, Weyman PD: **Designer diatom episomes delivered by bacterial**  
462 **conjugation.** *Nat Commun* 2015, **6**:6925.
- 463 21. Cook O, Hildebrand M: **Enhancing LC-PUFA production in Thalassiosira pseudonana by**  
464 **overexpressing the endogenous fatty acid elongase genes.** *J Appl Phycol* 2015, **28**:897–905.

465 22. Doan TTY, Sivaloganathan B, Obbard JP: **Screening of marine microalgae for biodiesel feedstock.**  
466 *Biomass and Bioenergy* 2011, **35**:2534–2544.

467 23. Malviya S, Scalco E, Audic S, Vincent F, Veluchamy A, Bittner L, Poulain J, Wincker P, Iudicone D,  
468 de Vargas C, Zingone A, Bowler C: **Insights into global diatom distribution and diversity in the**  
469 **world's ocean.** *Proc Natl Acad Sci* 2015, **348**:in review.

470 24. Shrestha RP, Hildebrand M: **Evidence for a regulatory role of diatom silicon transporters in**  
471 **cellular silicon responses.** *Eukaryot Cell* 2015, **14**:29.

472 25. Scheffel A, Poulsen N, Shian S, Kröger N: **Nanopatterned protein microrings from a diatom that**  
473 **direct silica morphogenesis.** *Proc Natl Acad Sci U S A* 2011, **108**:3175–3180.

474 26. Poulsen N, Scheffel A, Sheppard VC, Chesley PM, Kröger N: **Pentalysine clusters mediate silica**  
475 **targeting of silaffins in *Thalassiosira pseudonana*.** *J Biol Chem* 2013, **288**:20100–20109.

476 27. Xing H-L, Dong L, Wang Z-P, Zhang H-Y, Han C-Y, Liu B, Wang X-C, Chen Q-J: **A CRISPR/Cas9**  
477 **toolkit for multiplex genome editing in plants.** *BMC Plant Biol* 2014, **14**:327.

478 28. Weber E, Engler C, Gruetzner R, Werner S, Marillonnet S: **A modular cloning system for**  
479 **standardized assembly of multigene constructs.** *PLoS One* 2011, **6**.

480 29. Doench JG, Hartenian E, Graham DB, Tothova Z, Hegde M, Smith I, Sullender M, Ebert BL, Xavier  
481 RJ, Root DE: **Rational design of highly active sgRNAs for CRISPR-Cas9-mediated gene inactivation.**  
482 *Nat Biotechnol* 2014, **32**:1262–7.

483 30. Xiao A, Cheng Z, Kong L, Zhu Z, Lin S, Gao G, Zhang B: **CasOT: A genome-wide Cas9/gRNA off-**  
484 **target searching tool.** *Bioinformatics* 2014, **30**:1180–1182.

485 31. Tarleton R, Peng D: **EuPaGDT: a web tool tailored to design CRISPR guide RNAs for eukaryotic**  
486 **pathogens.** *Microb Genomics* 2015, **1**:1–7.

487 32. Nekrasov V, Staskawicz B, Weigel D, Jones JDG, Kamoun S: **Targeted mutagenesis in the model**  
488 **plant *Nicotiana benthamiana* using Cas9 RNA-guided endonuclease.** *Nat Biotechnol* 2013, **31**:691–  
489 693.

490 33. Belhaj K, Chaparro-Garcia A, Kamoun S, Nekrasov V: **Plant genome editing made easy: targeted**  
491 **mutagenesis in model and crop plants using the CRISPR/Cas system.** *Plant Methods* 2013, **9**:39.

492 34. Price, N.M., Harrison, G.I., Hering, J.G., Hudson, R.J., Nirel, P.M., Palenik, B. and Morel FM:  
493 **Preparation and Chemistry of the Artificial Algal Culture Medium Aquil.** *Biol Oceanogr* 1989, **6**:443–  
494 461.

495 35. Pinto FL, Lindblad P: **A guide for in-house design of template-switch-based 5'?? rapid**  
496 **amplification of cDNA ends systems.** *Anal Biochem* 2010, **397**:227–232.

497 36. Stothard P: **The Sequence Manipulation Suite: JavaScript Programs for Analyzing and**  
498 **Formatting Protein and DNA Sequences.** *Biotechniques* 2000, **28**:1102–1104.

37. Brooks, C., Nekrasov, V., Lippman, Z.B. and Van Eck J: **Efficient Gene Editing in Tomato in the First Generation Using the Clustered Regularly Interspaced Short Palindromic Repeats/CRISPR-Associated9 System**. *Plant Physiol* 2014, **166**:1292–1297.
38. Jacobs TB, LaFayette PR, Schmitz RJ, Parrott W a: **Targeted genome modifications in soybean with CRISPR/Cas9**. *BMC Biotechnol* 2015, **15**:16.
39. Sakuma T, Nishikawa A, Kume S, Chayama K, Yamamoto T: **Multiplex genome engineering in human cells using all-in-one CRISPR/Cas9 vector system**. *Sci Rep* 2014, **4**:5400.
40. Port F, Chen H-M, Lee T, Bullock SL: **Optimized CRISPR/Cas tools for efficient germline and somatic genome engineering in *Drosophila***. *Proc Natl Acad Sci U S A* 2014, **111**:E2967–2976.
41. Weber E, Gruetzner R, Werner S, Engler C, Marillonnet S: **Assembly of designer tal effectors by golden gate cloning**. *PLoS One* 2011, **6**.
42. Krysiak C, Mazus B, Buchowicz J: **Relaxation, linearization and fragmentation of supercoiled circular DNA by tungsten microprojectiles**. *Transgenic Res* 1999, **8**:303–306.
43. Zheng Q, Cai X, Tan MH, Schaffert S, Arnold CP, Gong X, Chen CZ, Huang S: **Precise gene deletion and replacement using the CRISPR/Cas9 system in human cells**. *Biotechniques* 2014, **57**:115–124.
44. Jinek M, Chylinski K, Fonfara I, Hauer M, Doudna J a, Charpentier E: **A Programmable Dual-RNA – Guided**. 2012, **337**(August):816–822.
45. Gupta S, Kathait A, Sharma V: **Computational Sequence Analysis and Structure Prediction of Jack Bean Urease**. 2015, **3**:185–191.
46. Olson RJ, Vaultot D, Chisholm SW: **Effects of environmental stresses on the cell cycle of 2 marine phytoplankton species**. *Plant Physiol* 1986, **80**:918–925.
47. Li W, Gao K, Beardall J: **Interactive Effects of Ocean Acidification and Nitrogen-Limitation on the Diatom *Phaeodactylum tricornutum***. *PLoS One* 2012, **7**.
48. Fan C, Glibert PM, Alexander J, Lomas MW: **Characterization of urease activity in three marine phytoplankton species, *Aureococcus anophagefferens*, *Prorocentrum minimum*, and *Thalassiosira weissflogii***. *Mar Biol* 2003, **142**:949–958.
49. Habel JE, Bursey EH, Rho BS, Kim CY, Segelke BW, Rupp B, Park MS, Terwilliger TC, Hung LW: **Structure of Rv1848 (UreA), the *Mycobacterium tuberculosis* urease ?? subunit**. *Acta Crystallogr Sect F Struct Biol Cryst Commun* 2010, **66**:781–786.
50. Jabri E, Andrew Karplus P: **Structures of the *Klebsiella aerogenes* urease apoenzyme and two active- site mutants**. *Biochemistry* 1996, **35**:10616–10626.
51. Hellen CUT, Sarnow P: **Internal ribosome entry sites in eukaryotic mRNA molecules Internal ribosome entry sites in eukaryotic mRNA molecules**. 2001:1593–1612.

## Figure captions



**Table 1.** Oligonucleotides used in this study. Ref. N° 1-3: oligos used in 5' RACE [35]. Ref. N° 4-16: primers for Golden Gate cloning, BsaI sites are underlined, 4nt overhangs are shown in *italics*, and sgRNA targets are shown in **bold**. Upper case indicates complement to the template. Ref. N° 17-20: primers for SDM, lower case indicates base change. Ref. N° 21-26: primers for screening transformants. Ref. N° 27-35: primers for sequencing the CRISPR-Cas construct.

**Figure 1.** Overview of level 1 and level 2 Golden Gate cloning for assembly of the CRISPR-Cas construct pAGM4723:TpCC\_Urease. Level 1 assemblies of pICH47742:FCP:Cas9YFP and pICH47751:U6:sgRNA\_Urease 1 are shown. BsaI or BpiI restriction enzymes cut outside the recognition site leading to specific 4nt overhangs which are complementary to adjacent modules, allowing several modules to be accurately assembled in one reaction. Complementary 4nt sequences are colour coded to indicate adjacent modules.

**Figure 2.** Screening by PCR and sequencing. Expected sgRNA cut indicated by ↓. PCR of targeted urease fragments from primary clones show a single higher MW band for M1 and WT, a lower MW band associated with the expected 37nt deletion for M4 and LM1 and two bands for M2 & M3. Sequence alignments of urease products with mutations are shown for primary clones. A few examples of PCR products from sub-clones are shown. Primary clones M2 and M3 appear to be mosaic with sub-clones containing bi-allelic and mixed products corresponding to full length urease and the lower MW band associated with the deletion. Sequence alignments from mono-allelic sub-clone M1\_9 and bi-allelic sub-clones from M2 and M3 are shown.

**Figure 3.** Growth rate of WT and mutant urease cell lines from two separate growth experiments (1) & (2). The WT cell line was grown in nitrate free (white), nitrate (dark grey) and urea (light grey) enriched media. Mutant cell lines were grown in nitrate or urea enriched media. Growth rate (division day<sup>-1</sup>) was measured in exponential phase and rates compared using analysis of variance with Tukey's pairwise comparisons.

**Figure 4.** Mean cell size (μm) measured at the end of exponential phase for WT and mutant cultures across two growth experiments (1) & (2). Cells were grown with nitrate (dark grey) or urea (light grey) as the sole nitrogen source. Cell size was compared using analysis of variance with Tukey's pairwise comparisons.

**Figure 5.** PCR of the targeted urease fragment following growth of WT and mutant cell lines in nitrate or urea. NEB 100bp ladder (1), WT in nitrate (2) and urea (3), M2\_10 in nitrate (4) and urea (5) and M3\_9 in nitrate (6) and urea (7).

**Figure 6.** Translated WT urease (a), frame 3 (b) and frame 1 of urease with the expected 37nt deletion (c) and frame 1 of urease with a 38nt deletion (d). Position of deletion indicated by ↓. The model WT protein contains 807aa. The figure shows the initial 260 amino acids for a and c including the start of the alpha sub-unit. Translations are identical for the unshown segments. Gamma (pink), Beta (green) and Alpha (blue) sub-units are highlighted in order. Expected start codon (red) and upstream out-of-frame start codons (grey) are highlighted.

**Supplementary Figure 1.** Screenshot of the final spreadsheet for choosing sgRNAs.

| Name              | Sequence                                                                | Ref. No |
|-------------------|-------------------------------------------------------------------------|---------|
| GS U6 R           | AGGTTTGCTTCTCTTCGATTATG                                                 | 1       |
| TSO               | GTCGCACGGTCCATCGCAGCAGTCACAGGGGG                                        | 2       |
| U sense           | GTCGCACGGTCCATCGCAGCAGTC                                                | 3       |
| Fcp:Nat F         | <u>tggtctcaggag</u> CTCGAGGTCGACGGTATC                                  | 4       |
| Fcp:Nat R         | <u>aggtctcaagcg</u> CGCAATTAACCCTCACTAAAGG                              | 5       |
| FCP prom F        | <u>tggtctcaggag</u> AGCTTGCGCTTTTCCGAG                                  | 6       |
| FCP prom R        | <u>aggtctcacat</u> TTTGGTATTGGTTTGGTAAATCAG                             | 7       |
| Cas9:YFP F        | <u>aggtctcaa</u> ATGGACAAGAAGTACTCCATTGG                                | 8       |
| Cas9:YFP R        | <u>aggtctcaaagc</u> TCACTTGTACAGCTCGTCCATG                              | 9       |
| FCP term F        | <u>aggtctcagctt</u> ATACTGGATTGGTGAATCAATG                              | 10      |
| FCP term R        | <u>tggtctcaagcg</u> GAGAACTGGAGCAGCTAC                                  | 11      |
| U6 prom F         | <u>cggctcaggag</u> CTTCATCAAGAGAGCAACCA                                 | 12      |
| U6 prom R         | <u>aggtctca</u> ACAATTTTCGGCAAAACGT                                     | 13      |
| Urease sgRNA1 F   | <u>aggtctcattgt</u> <b>gtcgtaatcaagtattgccg</b> GTTTTAGAGCTAGAAATAGCAAG | 14      |
| Urease sgRNA2 F   | <u>aggtctcattgt</u> <b>gtttccgatctaattgccat</b> GTTTTAGAGCTAGAAATAGCAAG | 15      |
| Urease sgRNA R    | <u>tggtctcaagcg</u> TAATGCCAACTTTGTACAAG                                | 16      |
| FCP prom SDM F    | TCCGCGGCAGaTCTCTGTCTG                                                   | 17      |
| FCP prim SDM R    | AGAAGTACCGTGTTGTTGCAGTG                                                 | 18      |
| NAT SDM F         | CGACACCGTaTTCCGCGTCAC                                                   | 19      |
| NAT SDM R         | GTGGTGAAGGACCCATCCAG                                                    | 20      |
| Cas9 screen F     | CCGAGACAAGCAGAGTGGAAG                                                   | 21      |
| Cas9 screen R     | AGAGCCGATTGATGTCCAGTTC                                                  | 22      |
| NAT screen F      | ATGACCACTCTTGACGACAC                                                    | 23      |
| NAT screen R      | TTGATTCACCAATCCAGTATGC                                                  | 24      |
| Urease screen F 1 | AAACAGACCACCTTCACCTC                                                    | 25      |
| Urease screen R   | CTCCACCTGTACGTCTCG                                                      | 26      |
| Fcp seq F         | CCATAAGTCAACGGCTCCAATC                                                  | 27      |
| NAT seq F         | CTCTTGACGACACGGCTTAC                                                    | 28      |
| Cas9 seq 1 F      | CATTACGGACGAGTACAAGGTG                                                  | 29      |
| Cas9 seq 2 F      | TGAACACGGAGATCACCAG                                                     | 30      |
| Cas9 seq 3 F      | CTTCCTGGACAATGAGGAGAAC                                                  | 31      |
| Cas9 seq 4 F      | CAAACCTGATCACACAACGGAAG                                                 | 32      |
| YFP FcpT seq F    | ACTACCTGAGCTACCAGTCC                                                    | 33      |
| sg2 seq R         | GTTTCCGATCTAATGTCCAT                                                    | 34      |
| sg1 seq F         | TGTGTCGTAATCAAGTATTGC                                                   | 35      |

Table 1

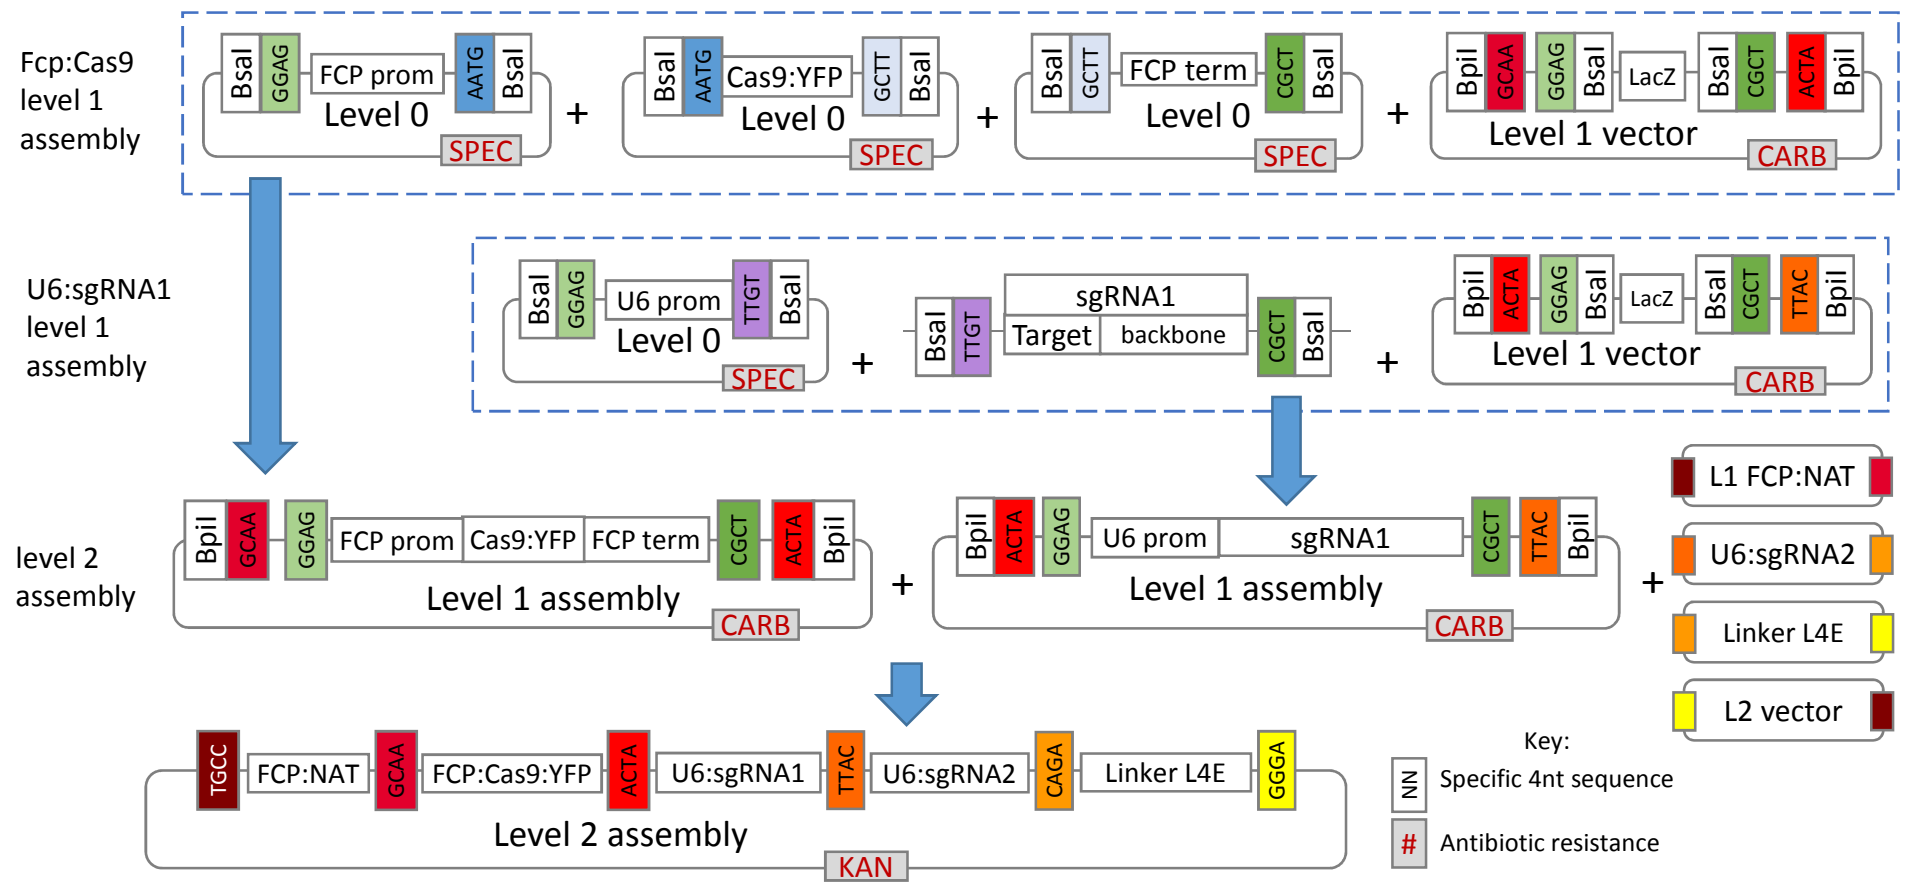

Figure 1

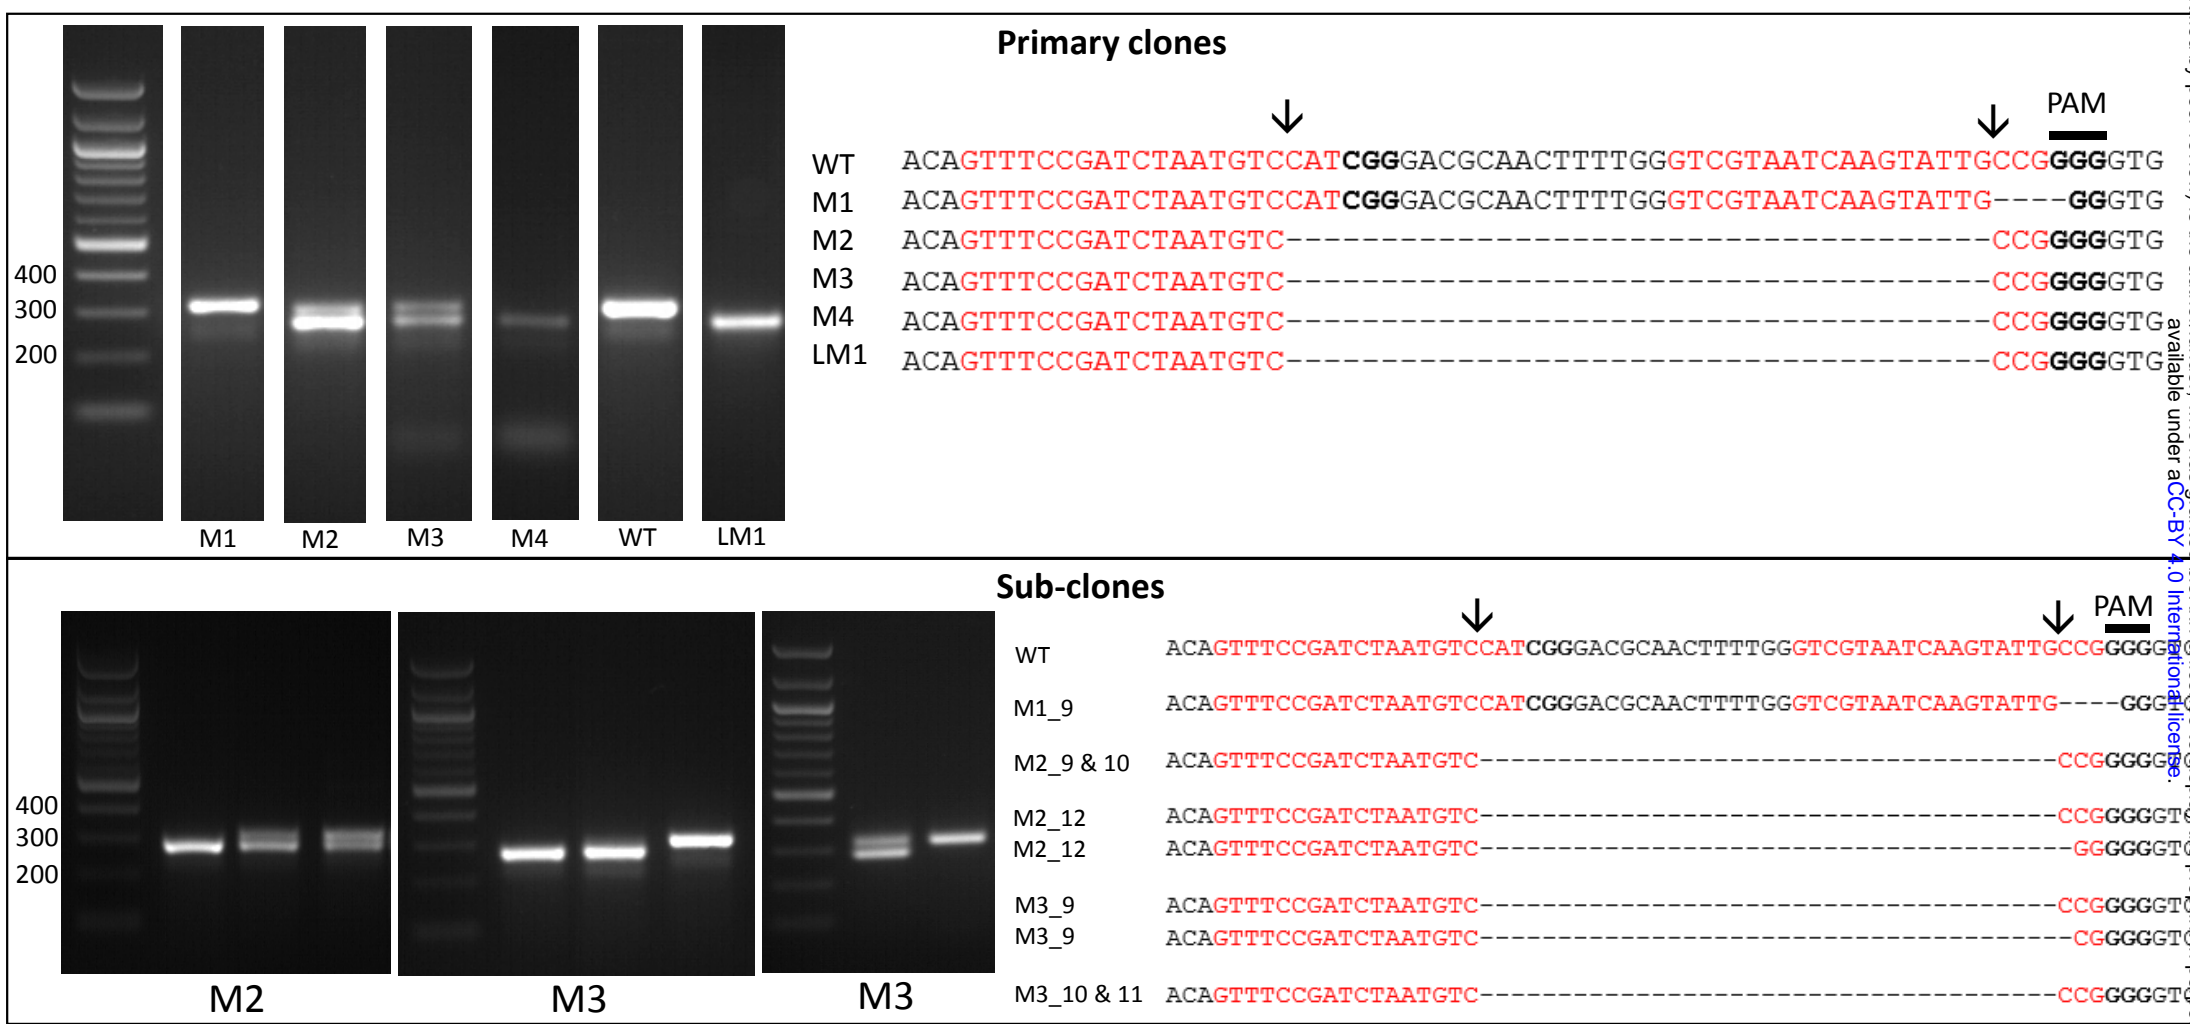

Figure 2

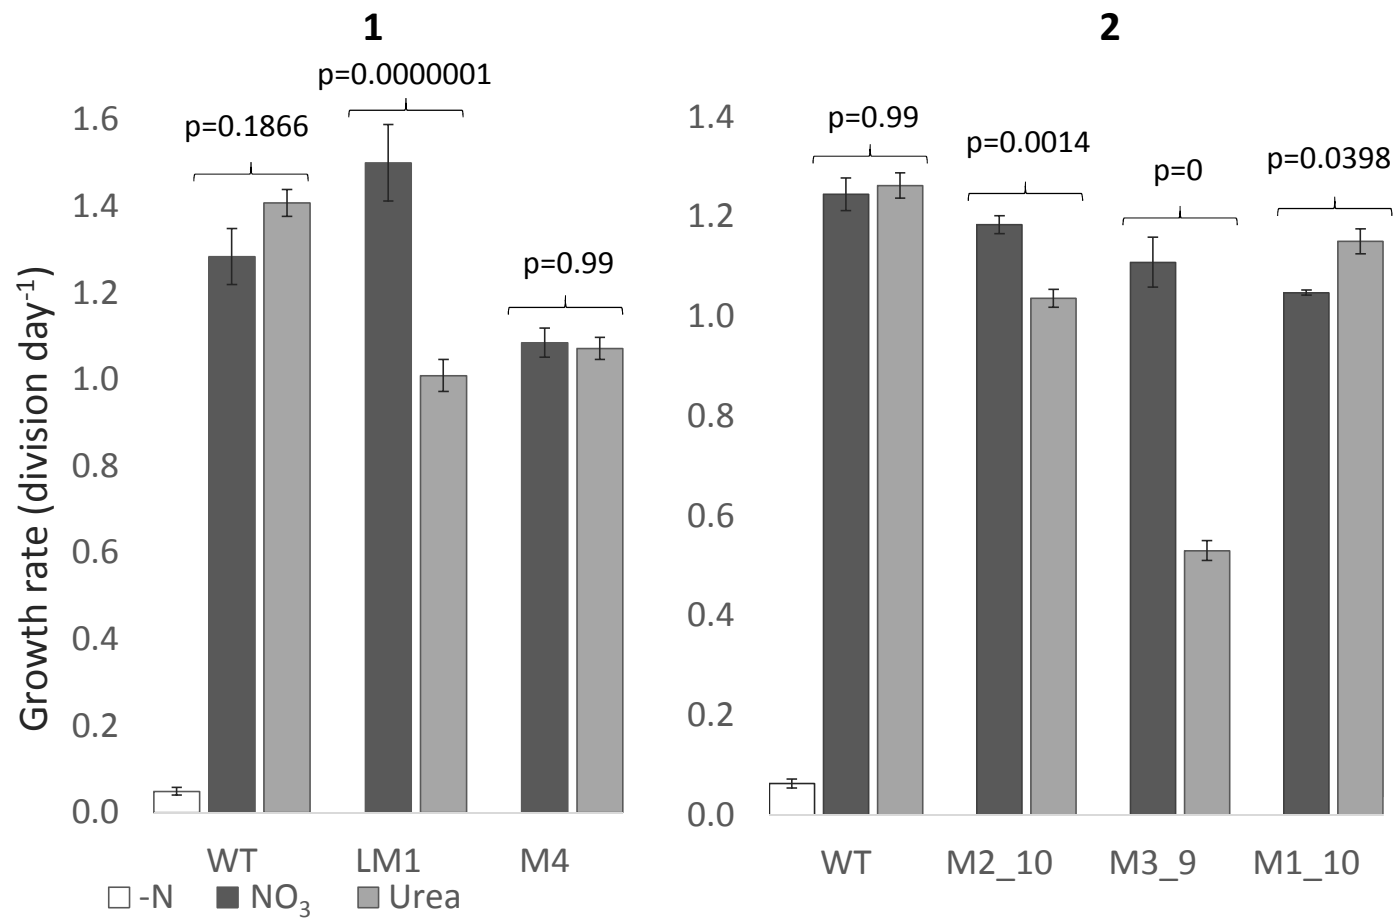

Figure 3



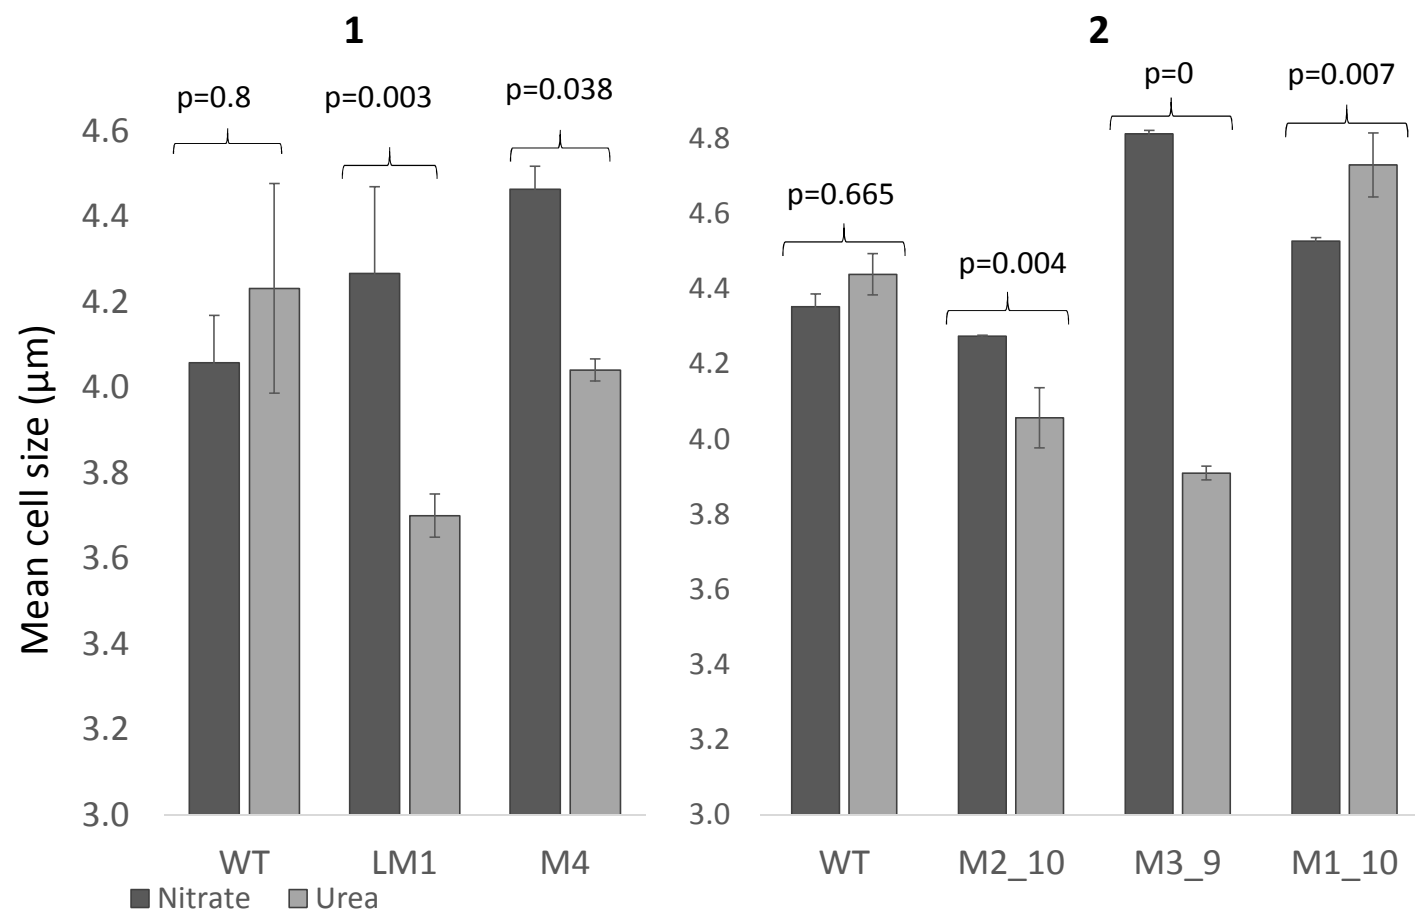

Figure 4

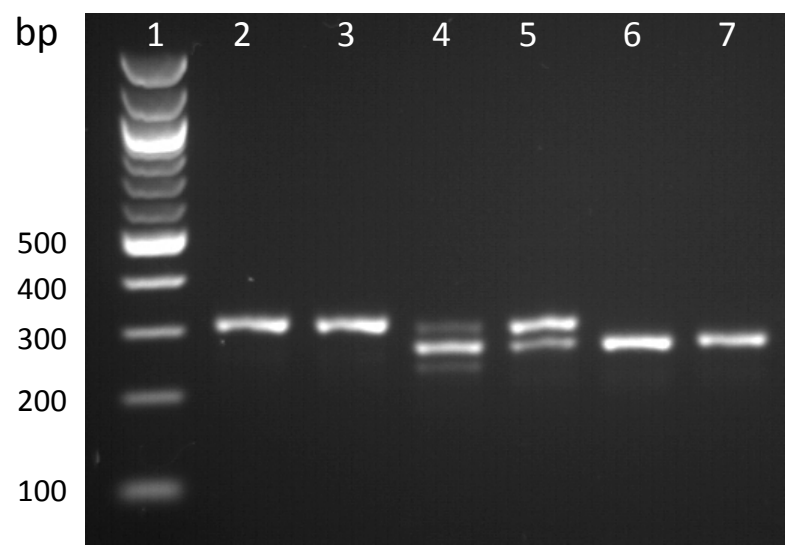

Figure 5

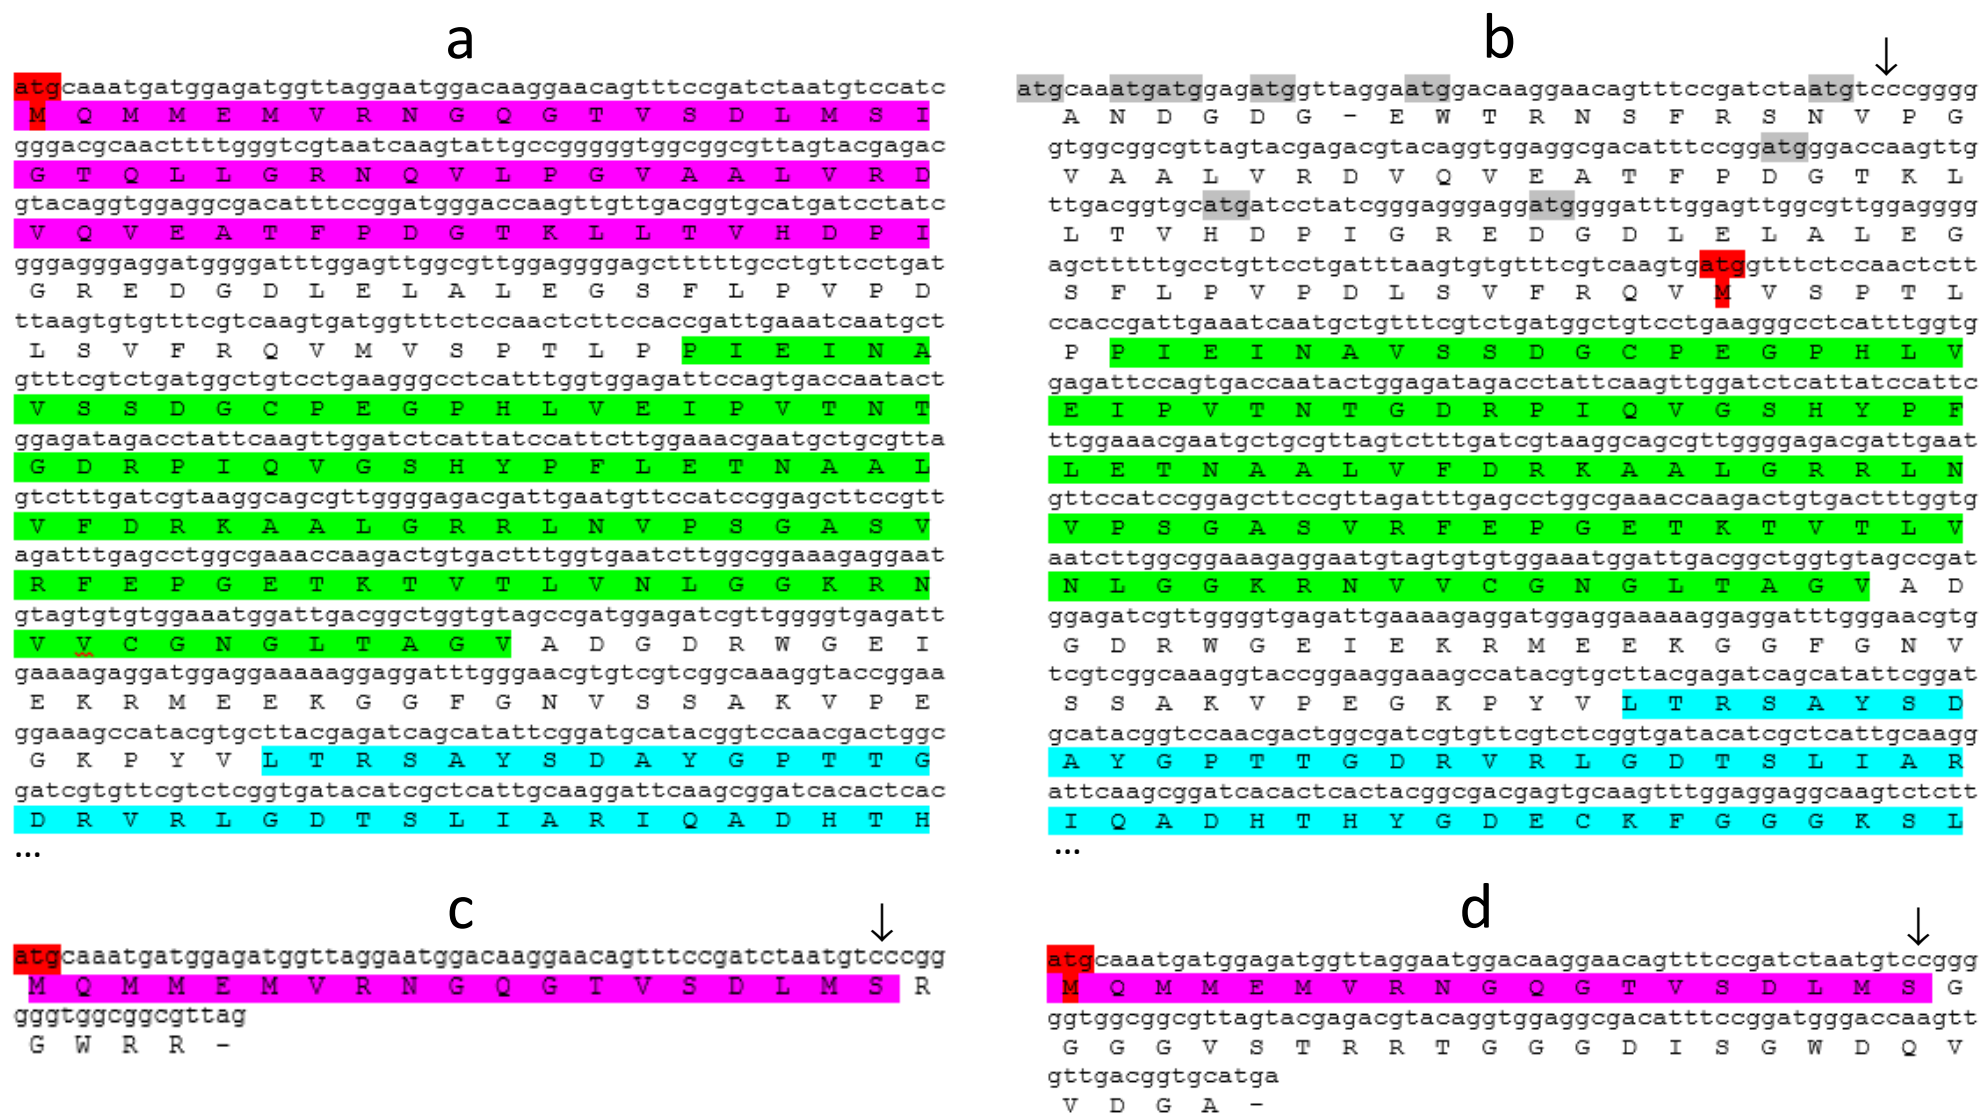

Figure 6

| Target sequence       | bp No | Cas9 cut | GC  | 5' | PAM | Location | Strand | Sense sequence        | sgRNA score | Restriction sites  |
|-----------------------|-------|----------|-----|----|-----|----------|--------|-----------------------|-------------|--------------------|
| GCCTCGAGTAGAAGTCACCG  | 41    | 44       | 40% | G  | TGG | Intron1  | -      | CGGTGACTTCTACTCGAGGC  | 0.8898      | HphI               |
| GCTCATTGCAAGGATTCAAG  | 915   | 932      | 45% | G  | CGG | Exon3    | +      | GCTCATTGCAAGGATTCAAG  | 0.8388      |                    |
| GTCGTAATCAAGTATTGCCG  | 158   | 175      | 40% | G  | GGG | Exon2    | +      | GTCGTAATCAAGTATTGCCG  | 0.7908      | HpaII              |
| GTTGGGGTGAGATTGAAAAG  | 755   | 772      | 40% | G  | AGG | Exon3    | +      | GTTGGGGTGAGATTGAAAAG  | 0.7898      |                    |
| GACTATTCATGCTTACCACA  | 1659  | 1676     | 55% | G  | CGG | Exon3    | +      | GACTATTCATGCTTACCACA  | 0.7731      |                    |
| GCATCATTTCCACATGACCA  | 1380  | 1383     | 30% | G  | GGG | Exon3    | -      | TGGTCATGTGGAAATGATGC  | 0.6920      |                    |
| GTGACTTTGGTGAATCTTGG  | 676   | 693      | 35% | G  | CGG | Exon3    | +      | GTGACTTTGGTGAATCTTGG  | 0.6834      |                    |
| GTAGCCGATGGAGATCGTTG  | 739   | 756      | 60% | G  | GGG | Exon3    | +      | GTAGCCGATGGAGATCGTTG  | 0.6533      |                    |
| GATTTAAGTGTGTTTCGTGG  | 319   | 336      | 45% | G  | TGG | Exon2    | +      | GATTTAAGTGTGTTTCGTGG  | 0.6478      |                    |
| GGATGGGACCAAGTTGTTGA  | 225   | 242      | 45% | G  | CGG | Exon2    | +      | GGATGGGACCAAGTTGTTGA  | 0.5997      |                    |
| GAGAGGTCATCACTCGTACG  | 2048  | 2065     | 35% | G  | TGG | Exon4    | +      | GAGAGGTCATCACTCGTACG  | 0.5634      | Maell Csp6I SplI   |
| GGAGTCACTACAATGTTTGG  | 1306  | 1323     | 40% | G  | AGG | Exon3    | +      | GGAGTCACTACAATGTTTGG  | 0.5336      |                    |
| GGTGCATGATCCTATCGGGA  | 246   | 263      | 65% | G  | GGG | Exon2    | +      | GGTGCATGATCCTATCGGGA  | 0.5331      |                    |
| GGTAATCCGGATAACAATGAA | 1138  | 1155     | 50% | G  | TGG | Exon3    | +      | GGTAATCCGGATAACAATGAA | 0.5016      | TspDTI             |
| GTTTCCGATCTAATGTCCAT  | 121   | 138      | 55% | G  | CGG | Exon2    | +      | GTTTCCGATCTAATGTCCAT  | 0.5004      | BclI               |
| GAATGGATGGATCAAGGTGG  | 1905  | 1908     | 55% | G  | TGG | Exon4    | -      | CCACCTTGATCCATCCATTC  | 0.4847      |                    |
| GATTGTACCAGGTCAAGTGA  | 411   | 428      | 40% | G  | TGG | Intron2  | +      | GATTGTACCAGGTCAAGTGA  | 0.4808      |                    |
| GGAGATAGACCTATTCAAGT  | 529   | 546      | 50% | G  | TGG | Exon3    | +      | GGAGATAGACCTATTCAAGT  | 0.4788      |                    |
| GCAACTACTGATGTAATTGC  | 1198  | 1215     | 50% | G  | GGG | Exon3    | +      | GCAACTACTGATGTAATTGC  | 0.4781      | MluCI              |
| GATGGTATCGGAGAACGATT  | 2467  | 2484     | 45% | G  | GGG | Exon4    | +      | GATGGTATCGGAGAACGATT  | 0.4765      |                    |
| GCGATAGCGTGGGCTCAGAT  | 2317  | 2334     | 50% | G  | GGG | Exon4    | +      | GCGATAGCGTGGGCTCAGAT  | 0.4762      | BclI BseMII        |
| GTGGAGGCGACATTTCCGGA  | 208   | 225      | 40% | G  | TGG | Exon2    | +      | GTGGAGGCGACATTTCCGGA  | 0.4649      | BseGI HpaII BspMII |

Supplementary Figure 1
